# Supplementary material for: Boosted ability of ZIF-8 for early-stage adsorption and degradation of chemical warfare agent simulants
Source: Royal Society of Chemistry journal article supplement (doi:10.1039/d3na00807j), 2023-01-01
Supplement: d3na00807j1.pdf [file d3na00807j1.pdf]

## Electronic Supplementary Information

### **Boosted ability of ZIF-8 for early-stage adsorption and degradation of chemical warfare agent simulants**

*Sojin Oh, Sujeong Lee, Gihyun Lee, and Moonhyun Oh\**

Department of Chemistry, Yonsei University, 50 Yonsei-ro, Seodaemun-gu, Seoul 03722,  
Republic of Korea

\*Corresponding author.

*E-mail:* moh@yonsei.ac.kr

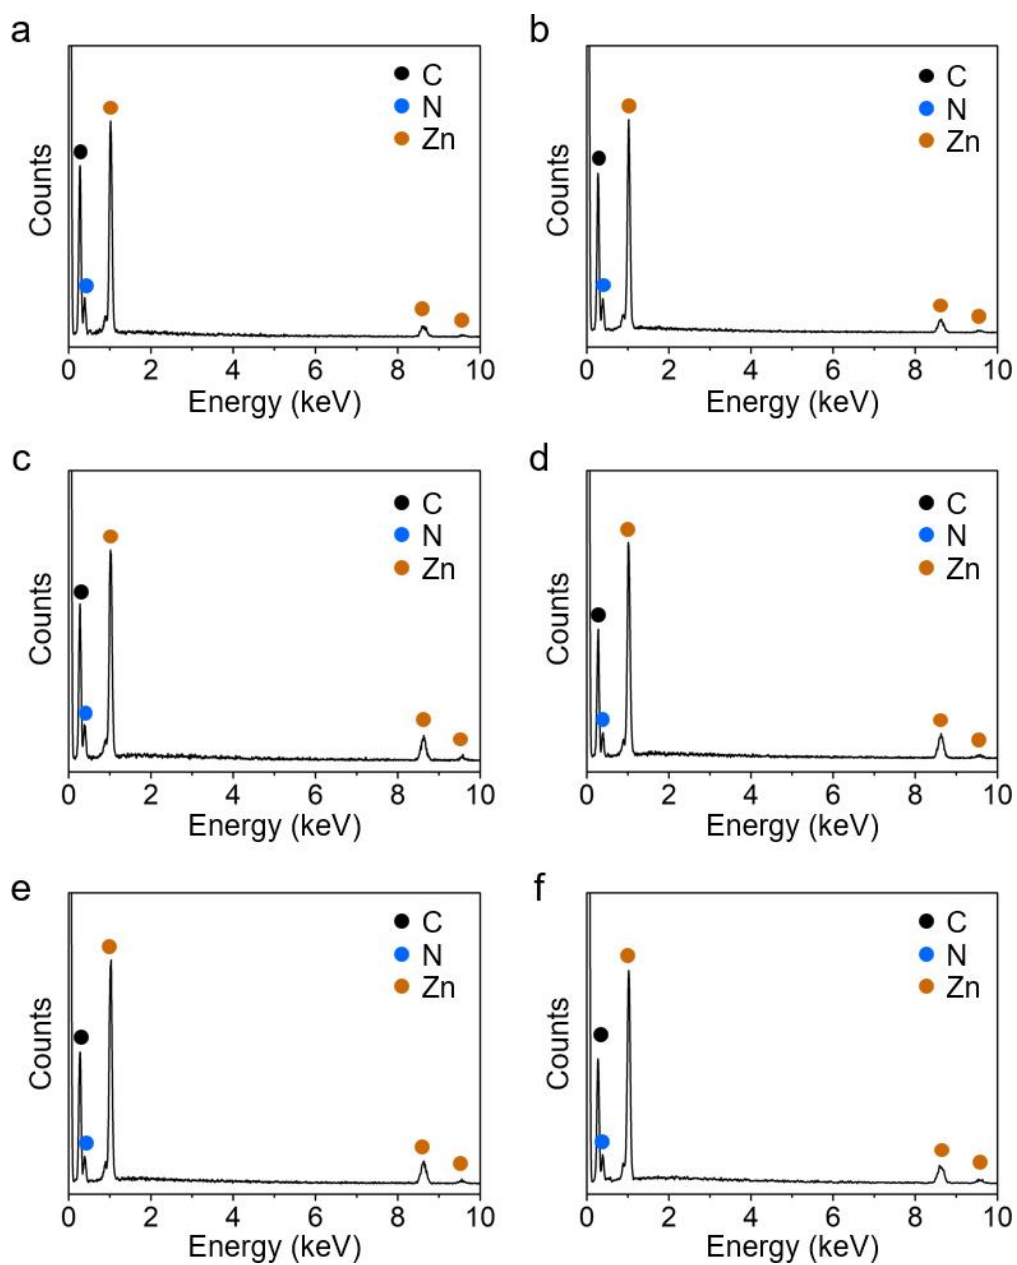

**Fig. S1** EDX spectra of (a) ZIF-8, (b) 450-ZIF-8, (c) 500-ZIF-8, (d) 550-ZIF-8, (e) 570-ZIF-8, and (f) 600-ZIF-8.

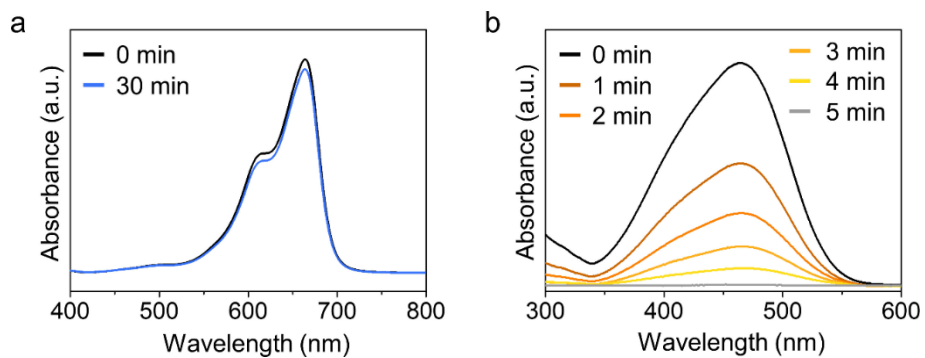

**Fig. S2** UV-vis spectra showing the adsorption properties of 550-ZIF-8 for the organic pollutants; (a) positively charged methylene blue and (b) negatively charged methyl orange.

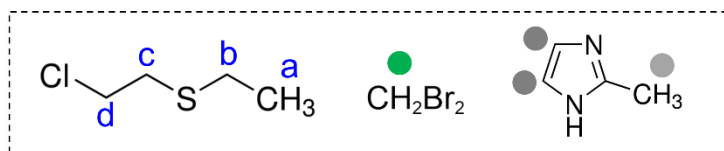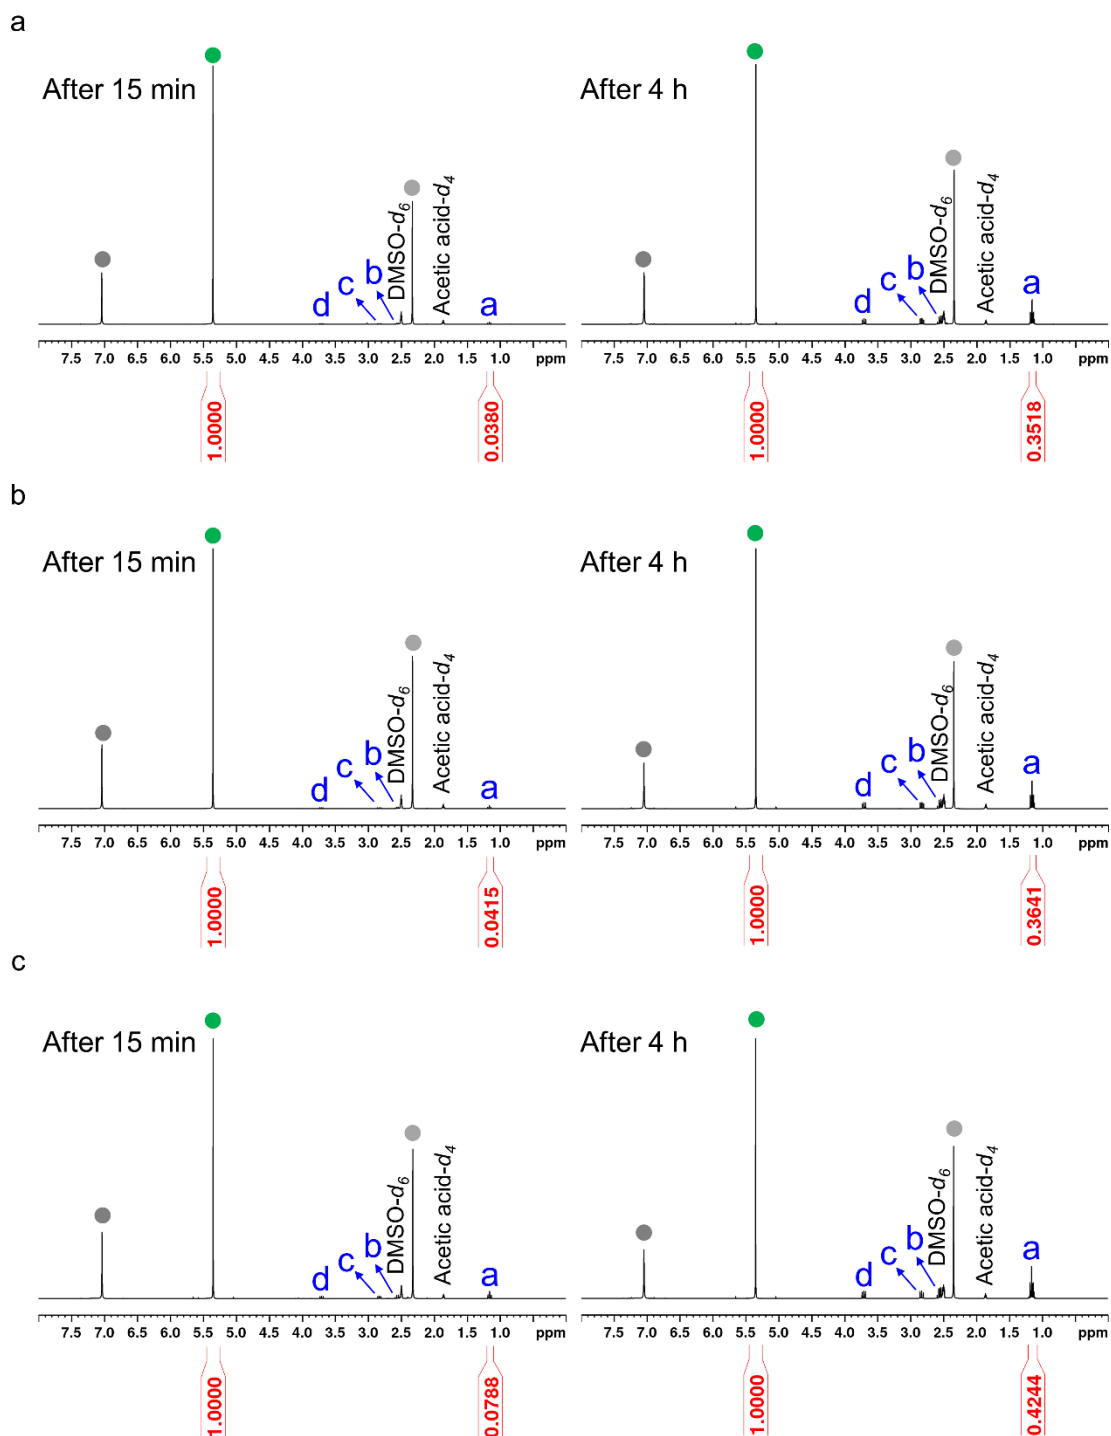

**Fig. S3**  $^1\text{H}$  NMR spectra showing CEES adsorption on ZIF samples after 15 min (left) and 4 h (right); (a) ZIF-8, (b) 450-ZIF-8, and (c) 500-ZIF-8.

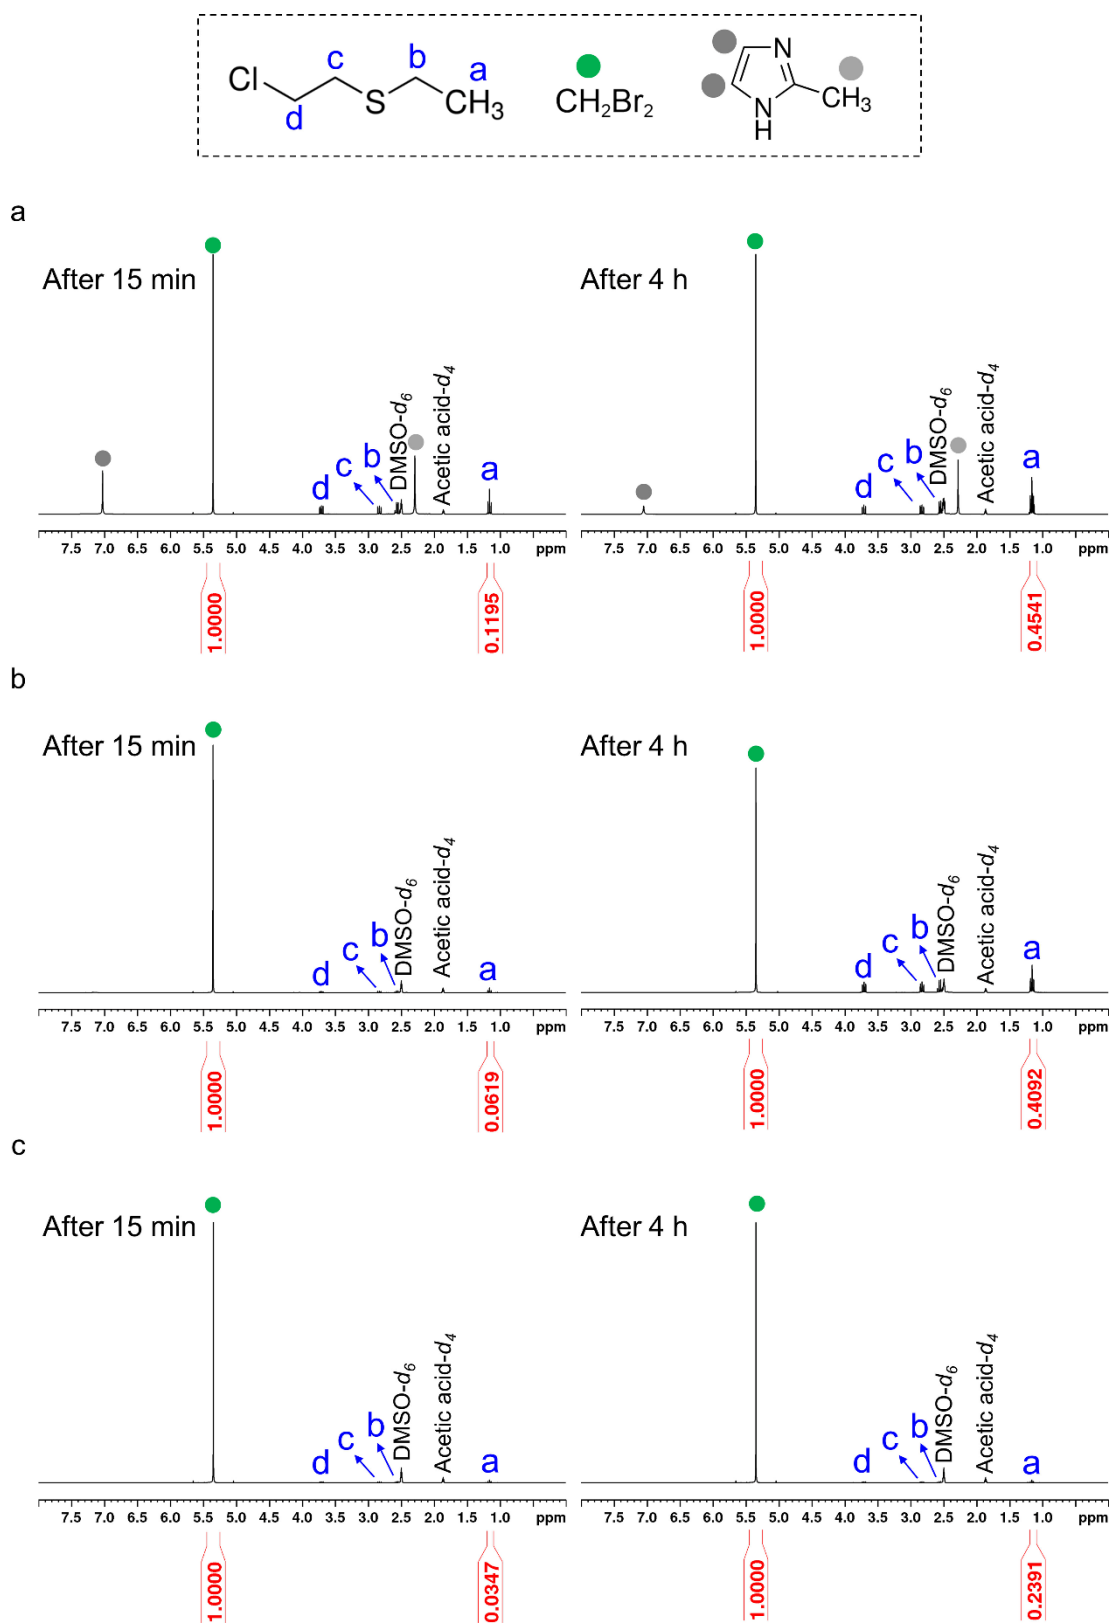

**Fig. S4** <sup>1</sup>H NMR spectra showing CEES adsorption on ZIF samples after 15 min (left) and 4 h (right); (a) 550-ZIF-8, (b) 570-ZIF-8, and (c) 600-ZIF-8.

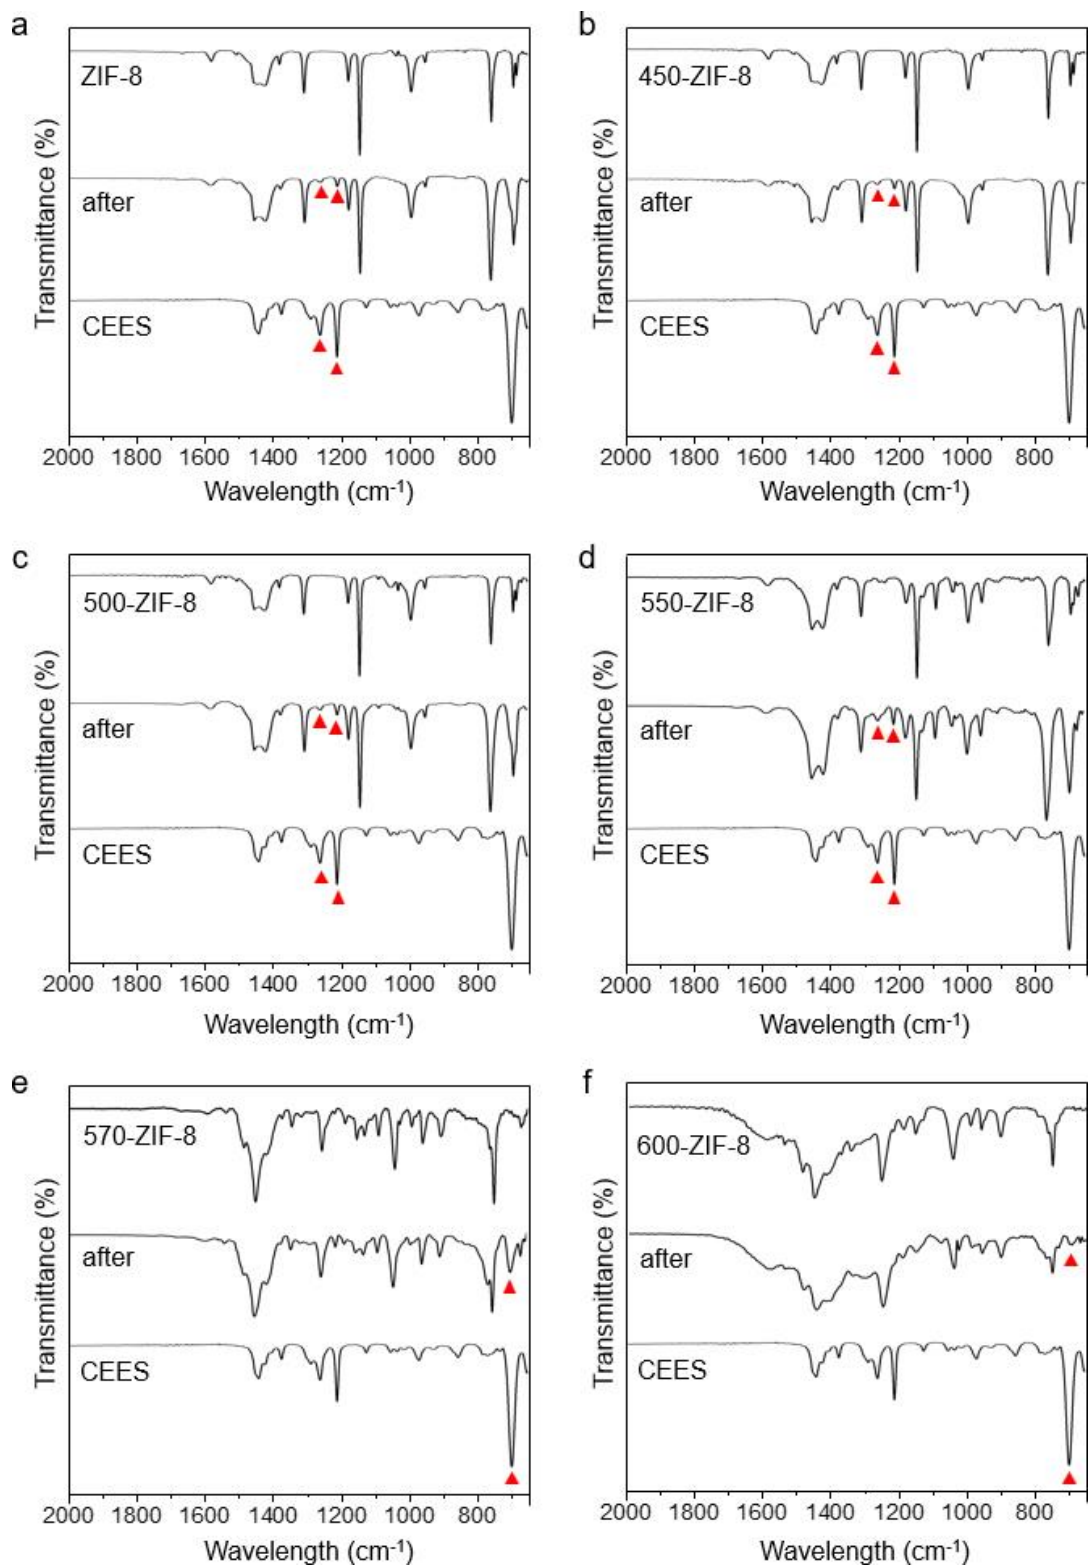

**Fig. S5** IR spectra of (a) ZIF-8, (b) 450-ZIF-8, (c) 500-ZIF-8, (d) 550-ZIF-8, (e) 570-ZIF-8, and (f) 600-ZIF-8 before and after the exposure to CEES vapors.

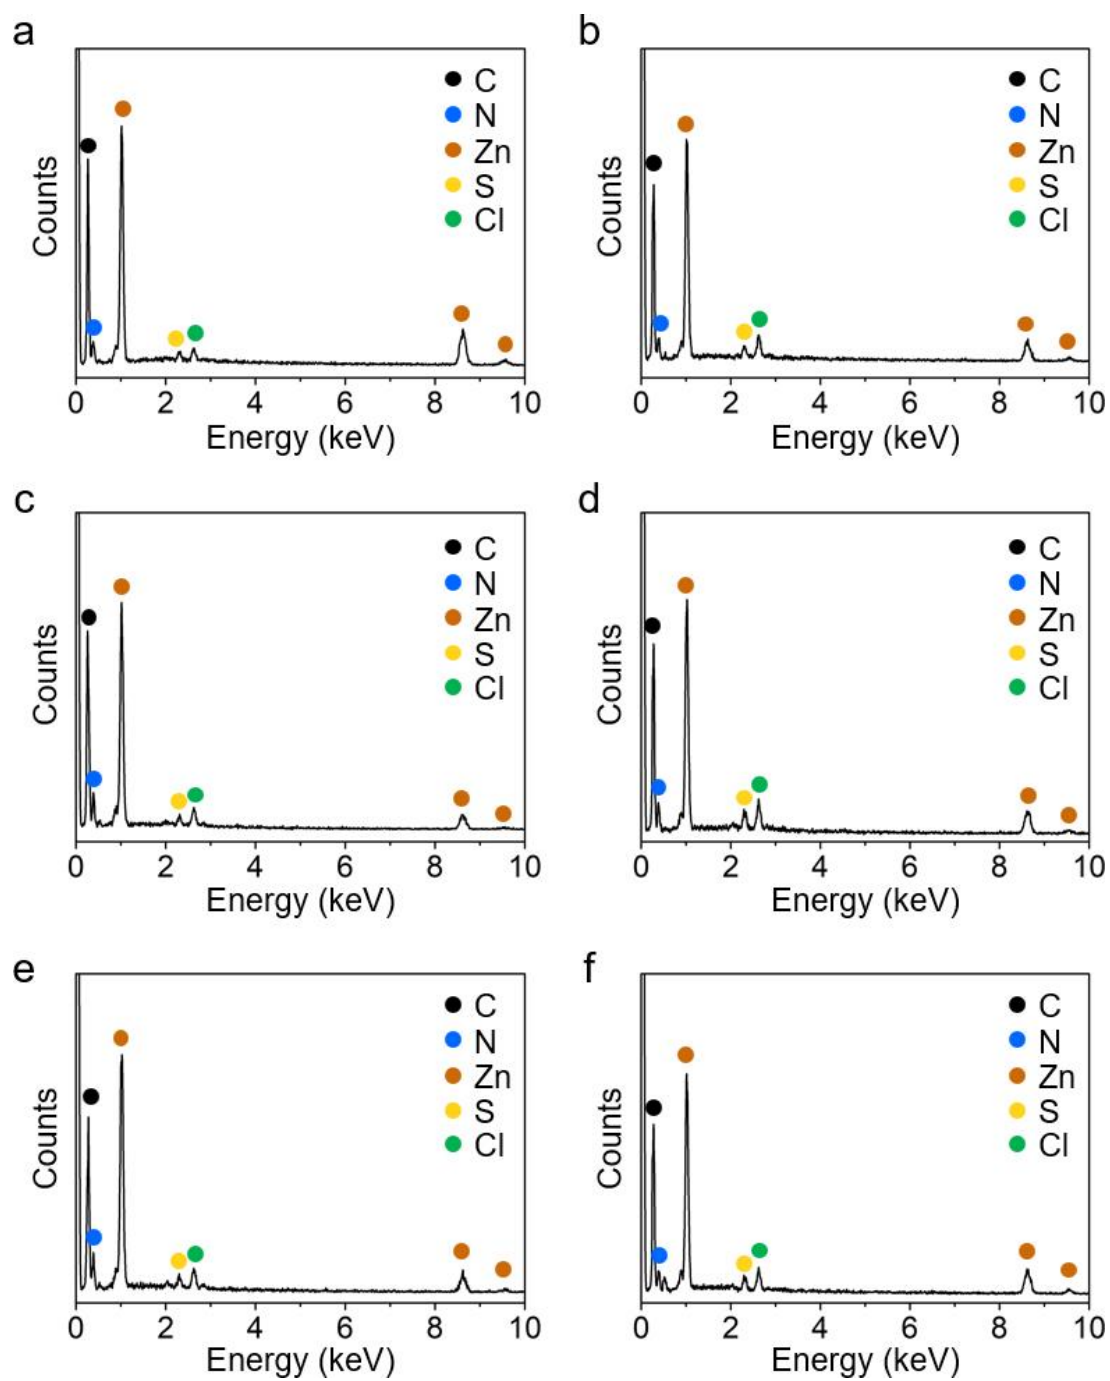

**Fig. S6** EDX spectra of (a) ZIF-8, (b) 450-ZIF-8, (c) 500-ZIF-8, (d) 550-ZIF-8, (e) 570-ZIF-8, and (f) 600-ZIF-8 after adsorption of CEES.

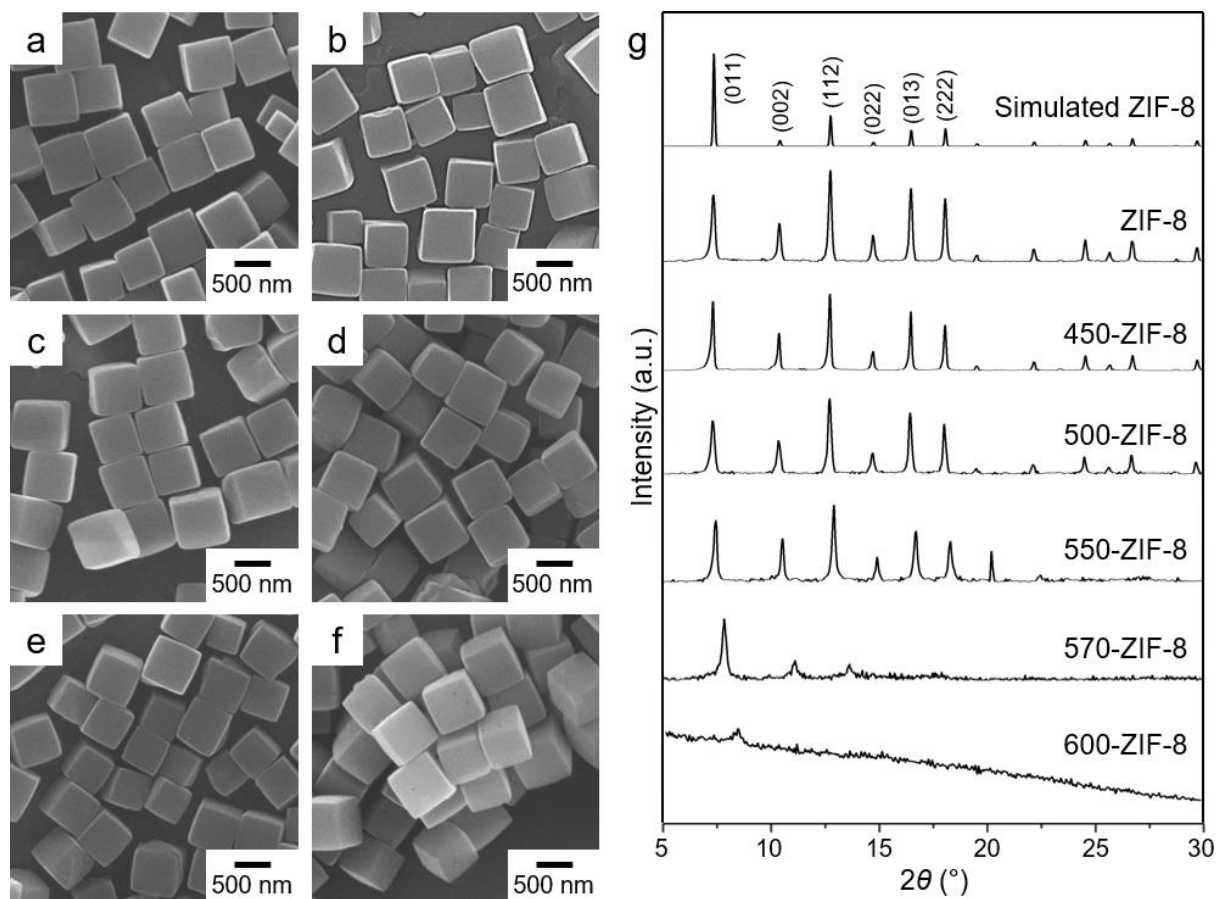

**Fig. S7** SEM images of (a) ZIF-8, (b) 450-ZIF-8, (c) 500-ZIF-8, (d) 550-ZIF-8, (e) 570-ZIF-8, and (f) 600-ZIF-8 after adsorption of CEES. (g) PXRD patterns of ZIF-8 and T-ZIF-8 samples after adsorption of CEES.



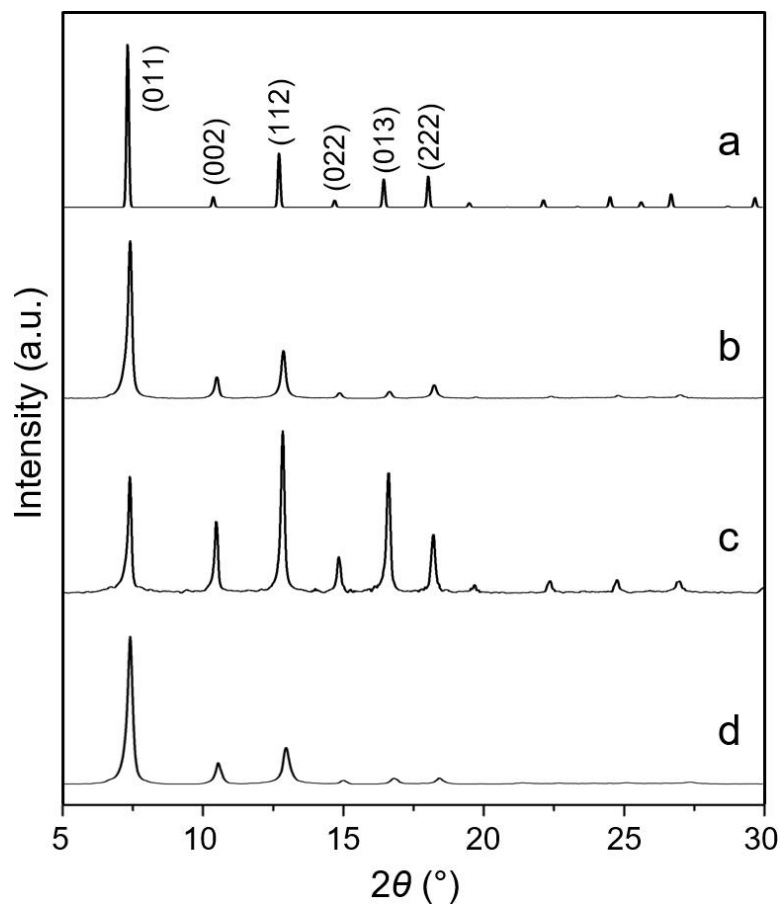

**Fig. S8** (a) Simulated PXRD pattern of ZIF-8. (b) PXRD pattern of ZIF-8 before adsorption of CEES. (c) PXRD pattern of ZIF-8 after adsorption of CEES. (d) PXRD pattern of the sample shown in (c) after washing with methanol to remove the adsorbed CEES.

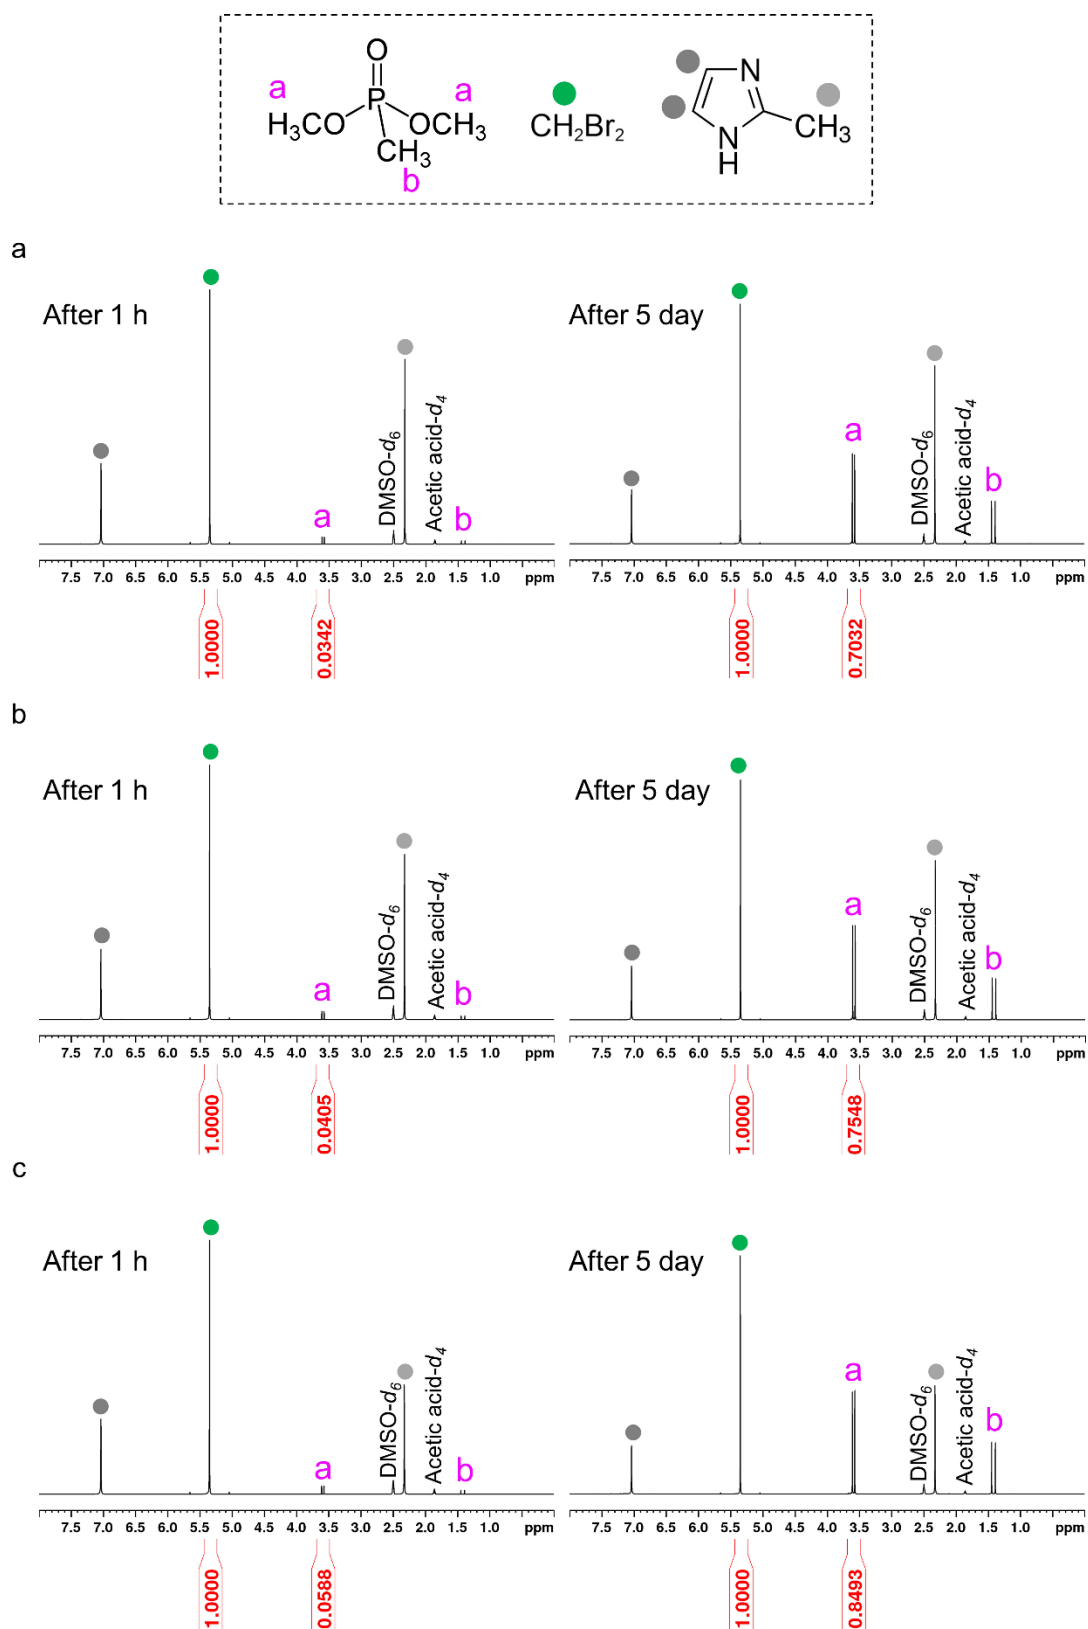

**Fig. S9**  $^1\text{H}$  NMR spectra showing DMMP adsorption on ZIF samples after 1 h (left) and 5 day (right); (a) ZIF-8, (b) 450-ZIF-8, and (c) 500-ZIF-8.

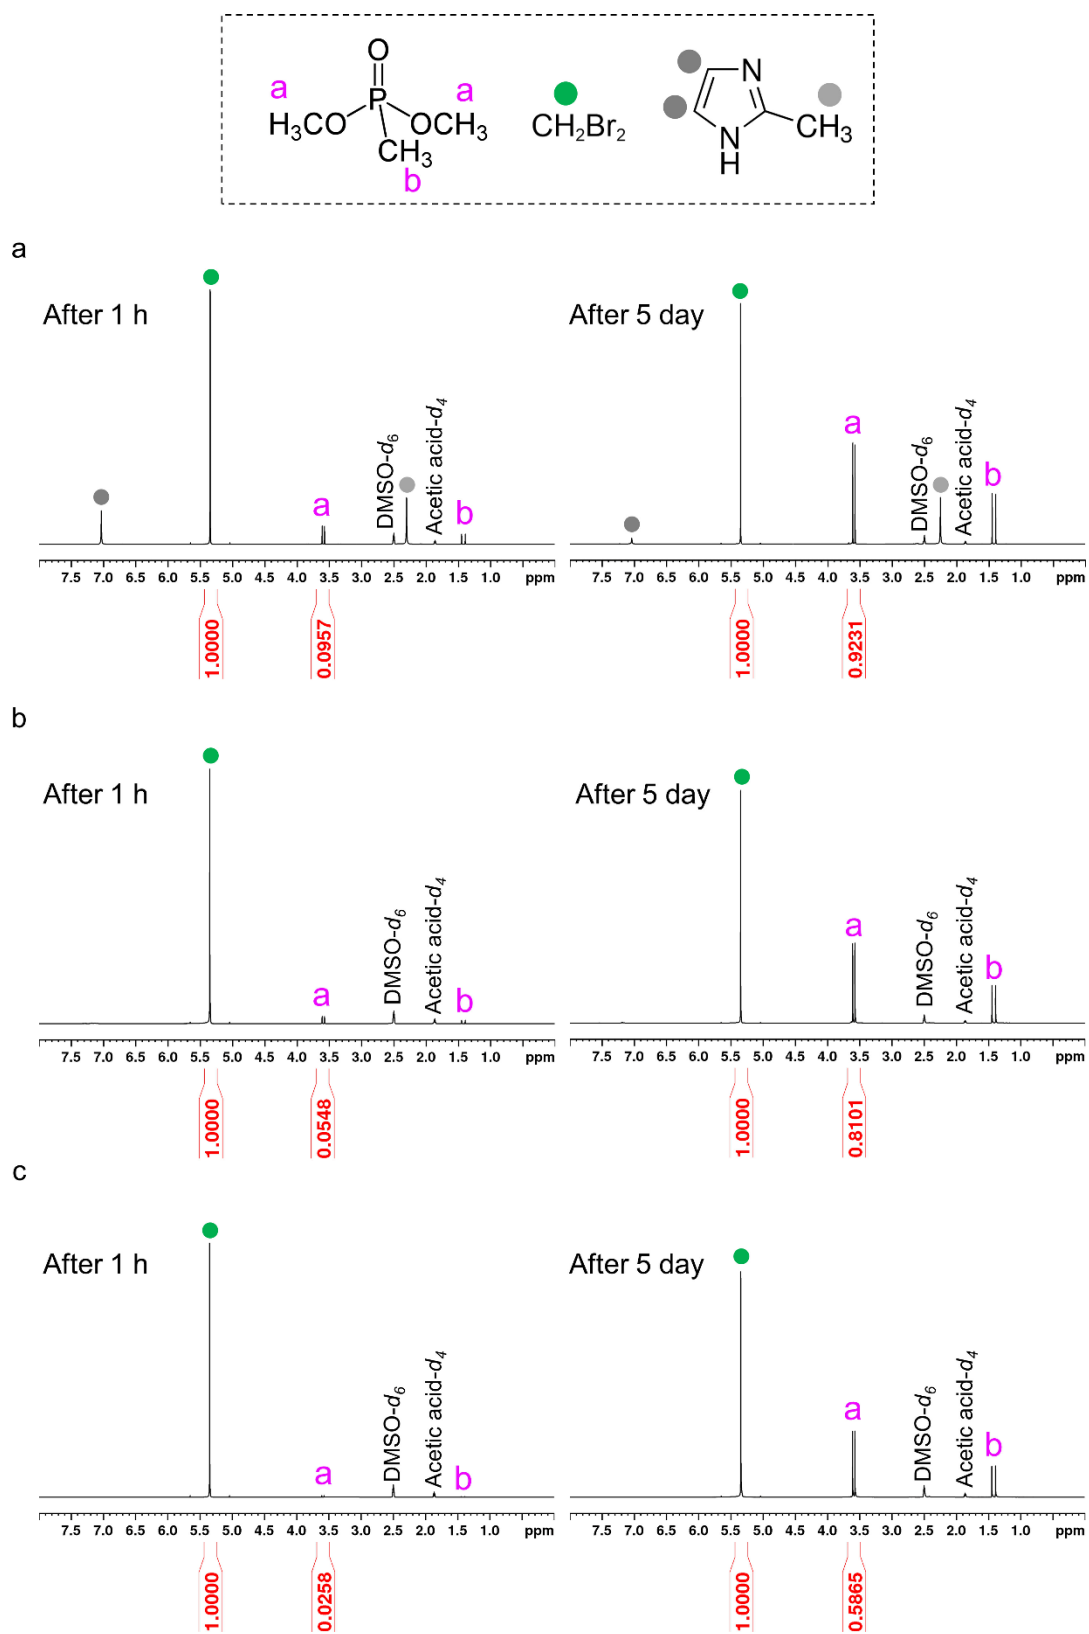

**Fig. S10**  $^1\text{H}$  NMR spectra showing DMMP adsorption on ZIF samples after 1 h (left) and 5 day (right); (a) 550-ZIF-8, (b) 570-ZIF-8, and (c) 600-ZIF-8.

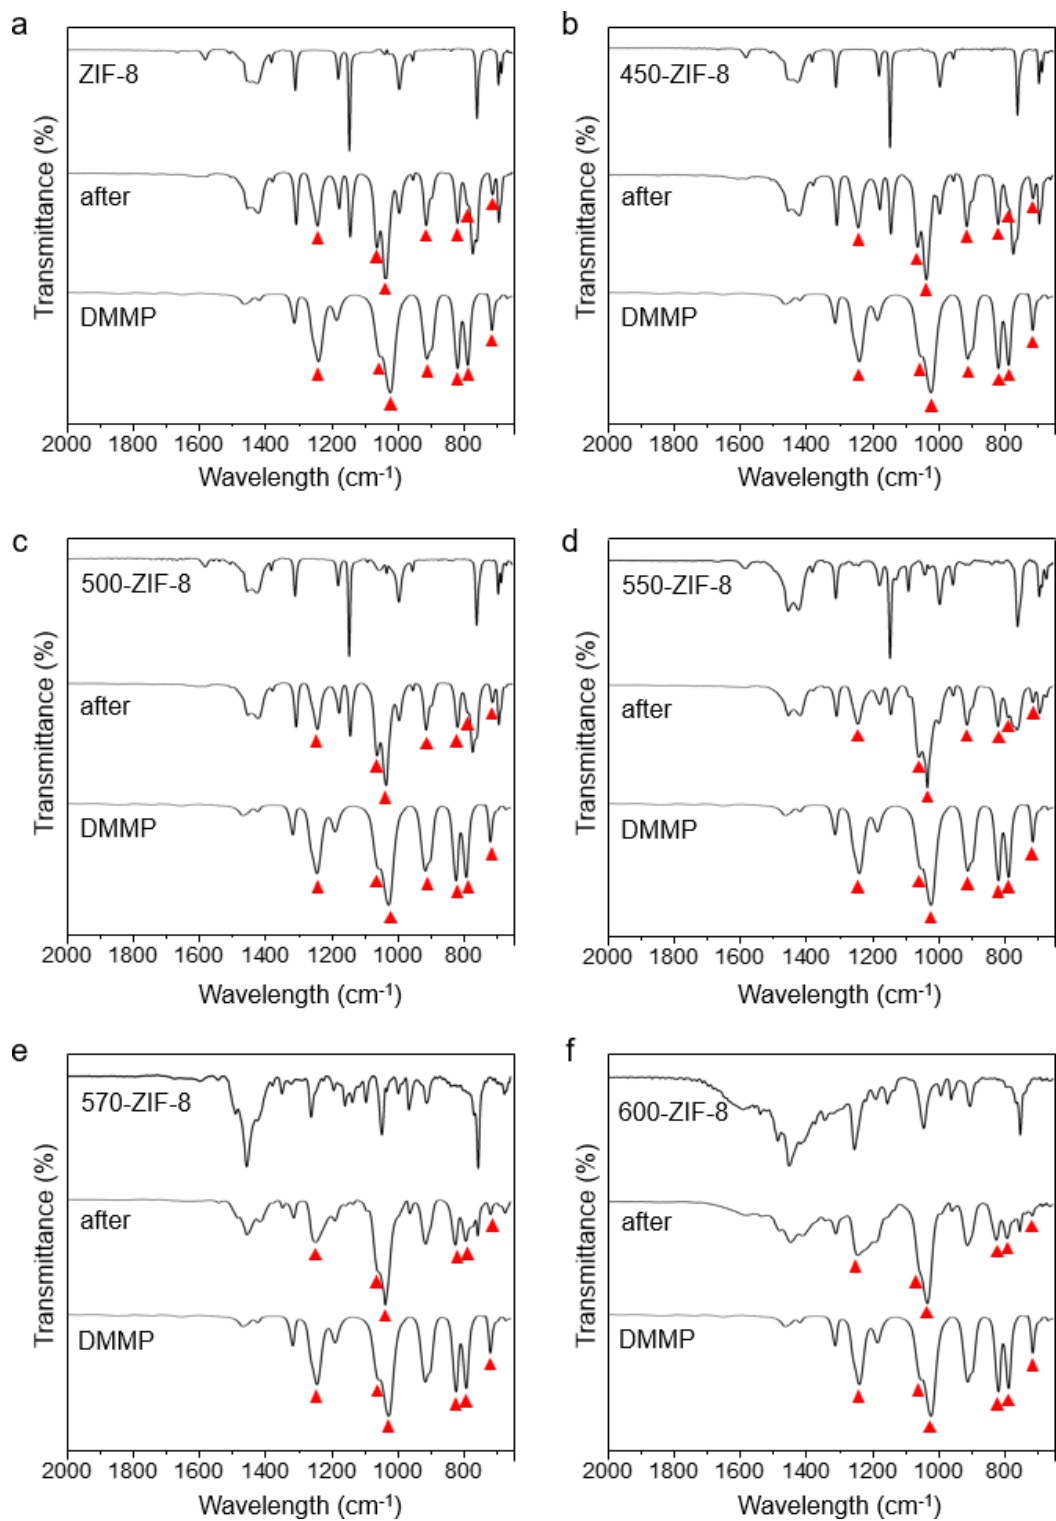

**Fig. S11** IR spectra of (a) ZIF-8, (b) 450-ZIF-8, (c) 500-ZIF-8, (d) 550-ZIF-8, (e) 570-ZIF-8, and (f) 600-ZIF-8 before and after the exposure to DMMP vapors.

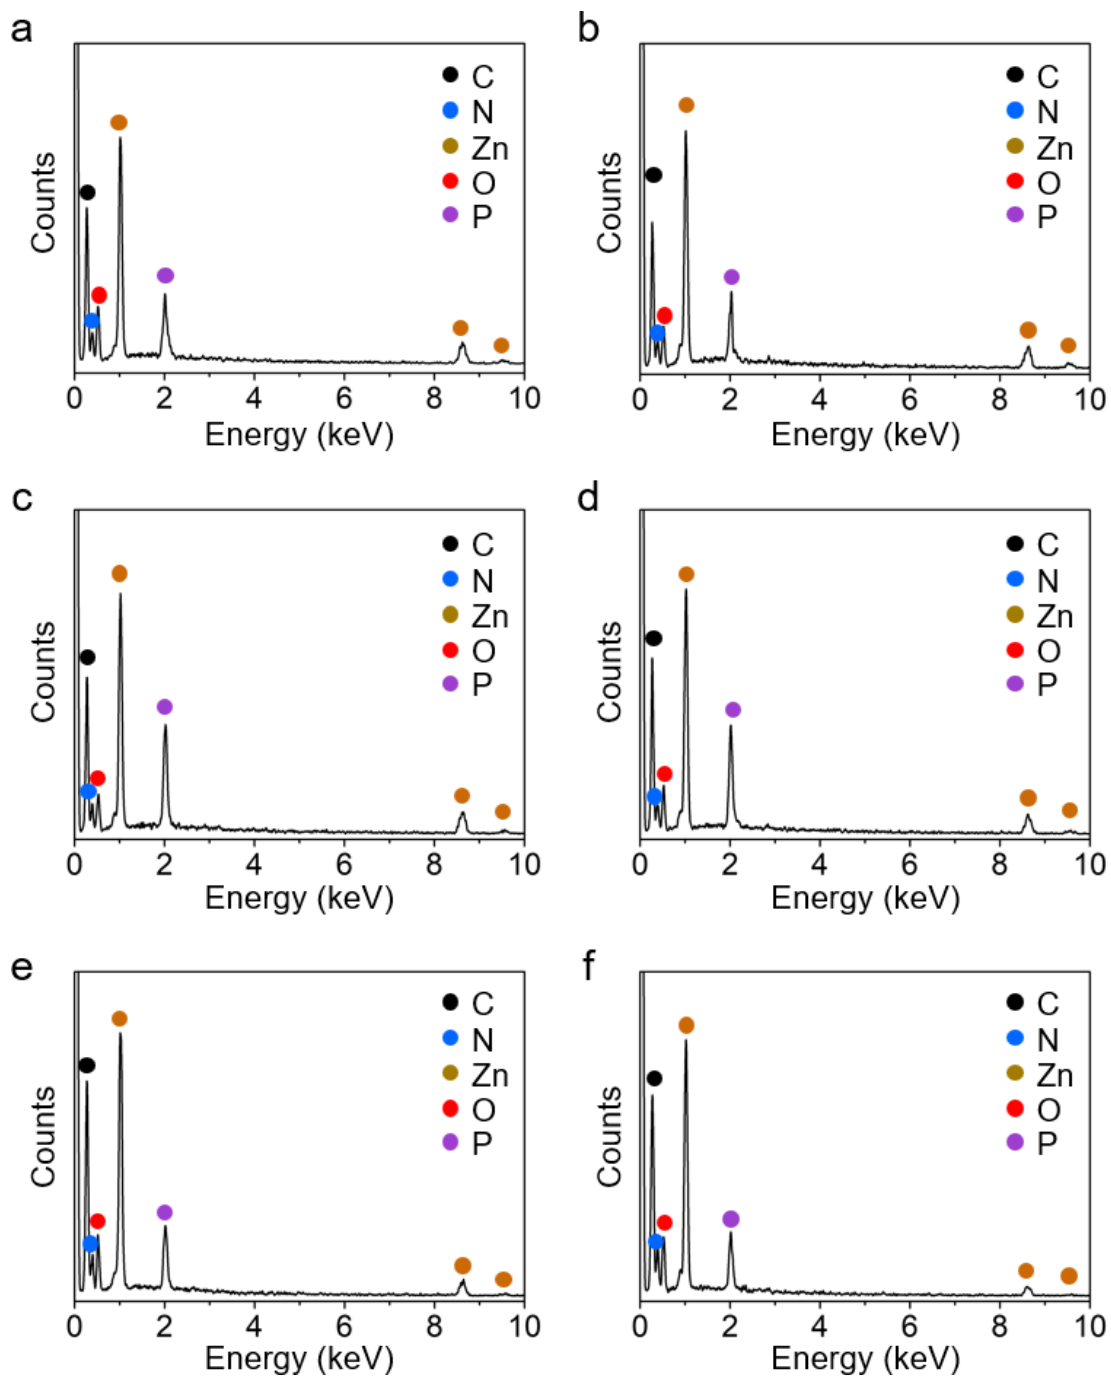

**Fig. S12** EDX spectra of (a) ZIF-8, (b) 450-ZIF-8, (c) 500-ZIF-8, (d) 550-ZIF-8, (e) 570-ZIF-8, and (f) 600-ZIF-8 after adsorption of DMMP.

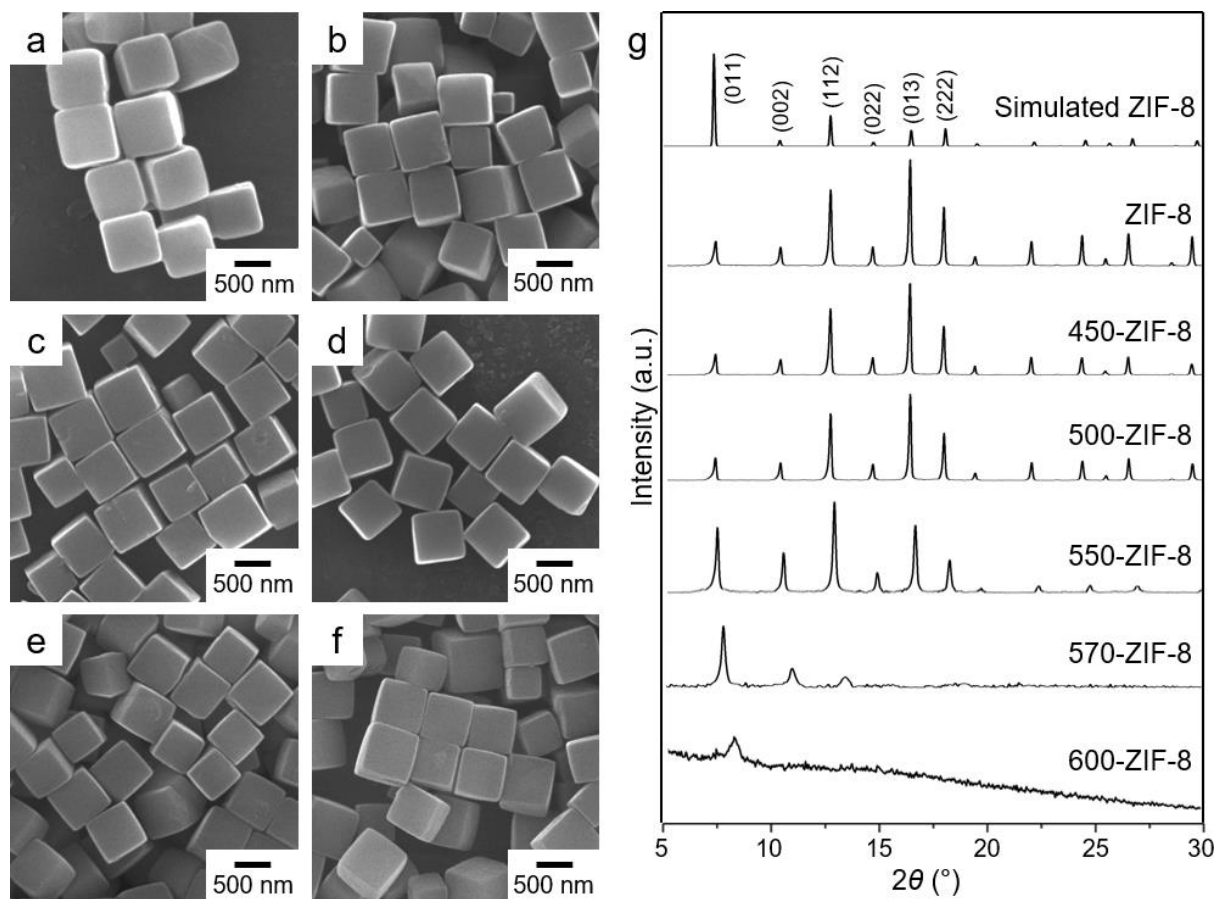

**Fig. S13** SEM images of (a) ZIF-8, (b) 450-ZIF-8, (c) 500-ZIF-8, (d) 550-ZIF-8, (e) 570-ZIF-8, and (f) 600-ZIF-8 after adsorption of DMMP. (g) PXRD patterns of ZIF-8 and T-ZIF-8 samples after adsorption of DMMP.

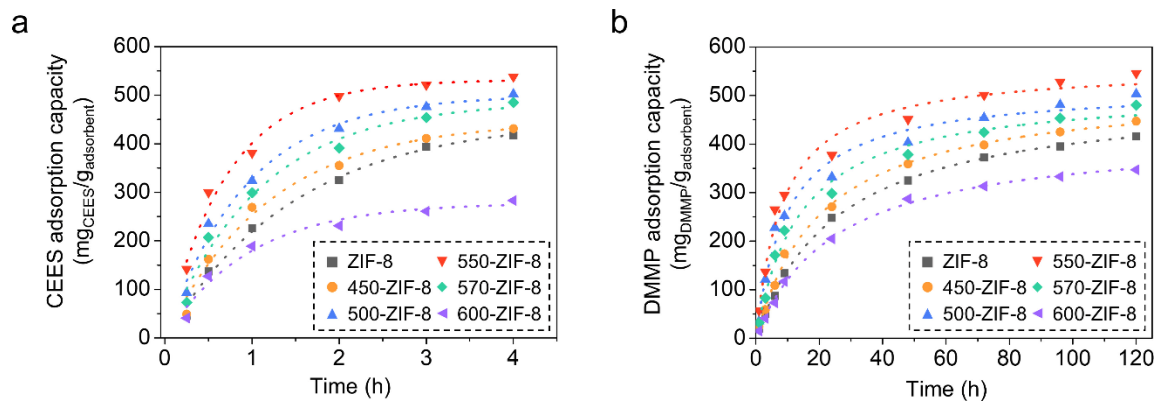

**Fig. S14** (a) CEES adsorption kinetic and (b) DMMP adsorption kinetic of ZIF-8 and T-ZIF-8 samples with the pseudo-first order model.

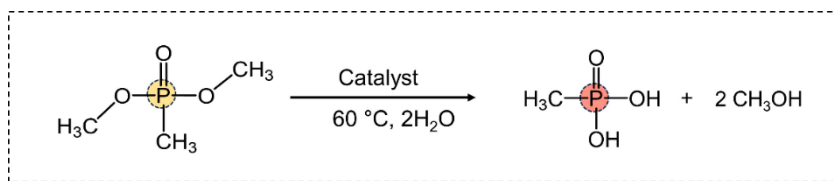

a

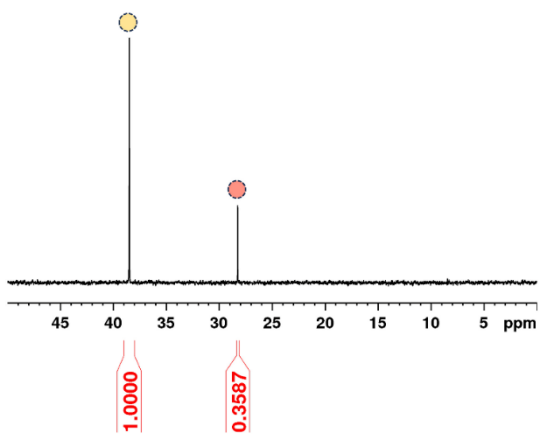

b

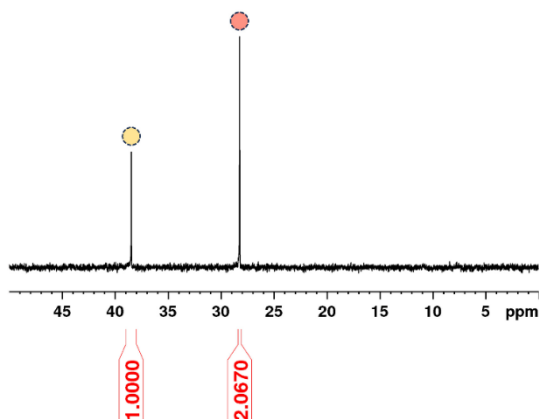

**Fig. S15**  $^{31}\text{P}$  NMR spectra showing catalytic degradation of DMMP after 72 h; (a) ZIF-8, and (b) 550-ZIF-8.



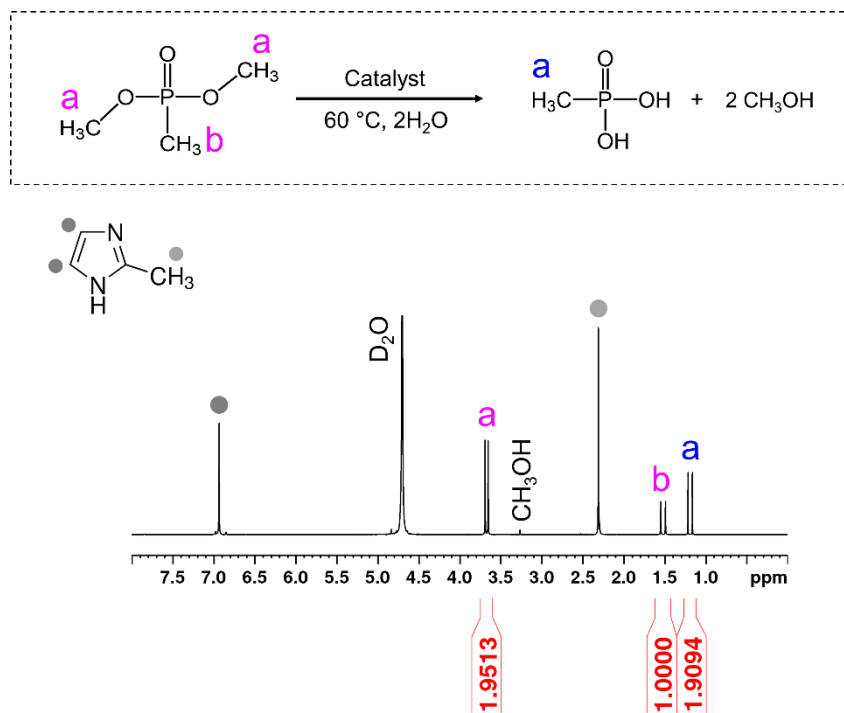

**Fig. S16** <sup>1</sup>H NMR spectrum showing catalytic degradation of DMMP after 72 h in the presence of 550-ZIF-8.

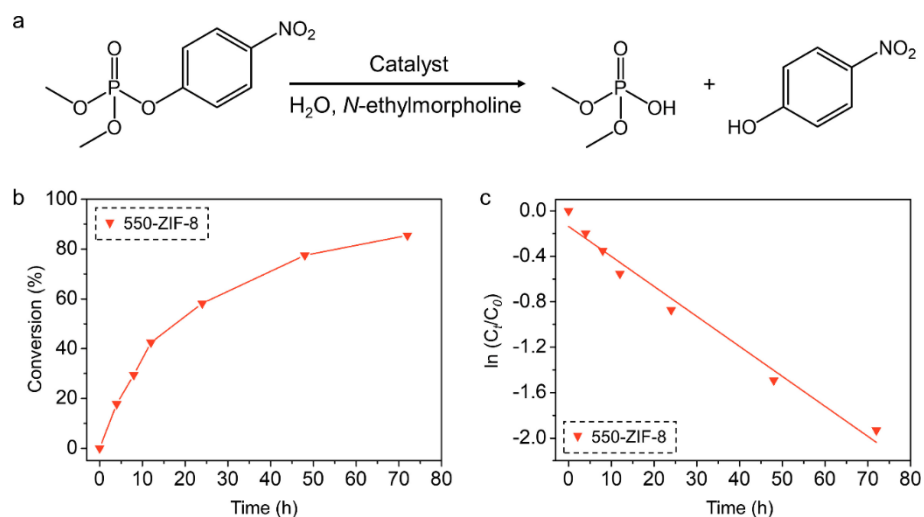

**Fig. S17** (a) Hydrolytic decomposition of DMNP to dimethoxy phosphate (DMP). (b) The plot for the conversion of DMNP to DMP with 550-ZIF-8 in varied time points. (c) Linear relationship between  $\ln(C_t/C_0)$  and reaction time in the presence of 550-ZIF-8.  $C_0$  and  $C_t$  represent the amounts of DMNP at the initial stage and time  $t$ , respectively.

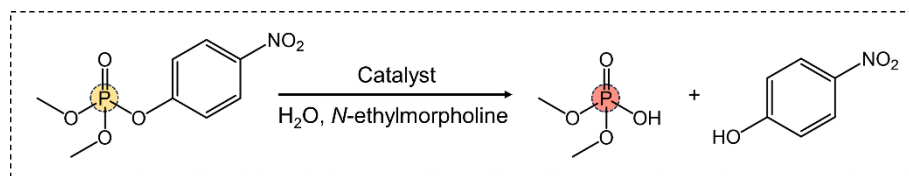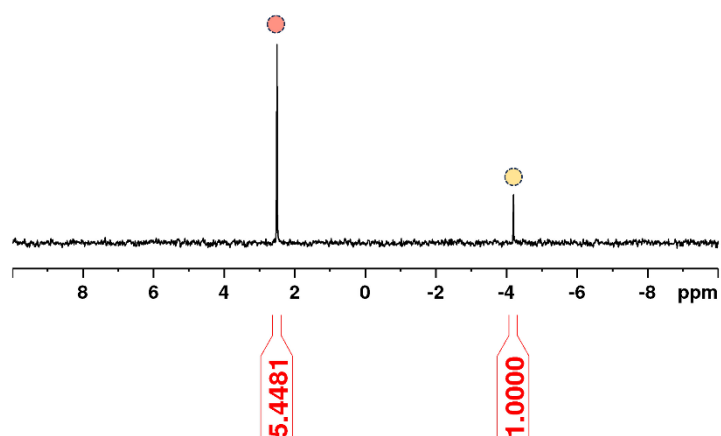

**Fig. S18** <sup>31</sup>P NMR spectrum showing catalytic degradation of DMNP after 72 h in the presence of 550-ZIF-8.

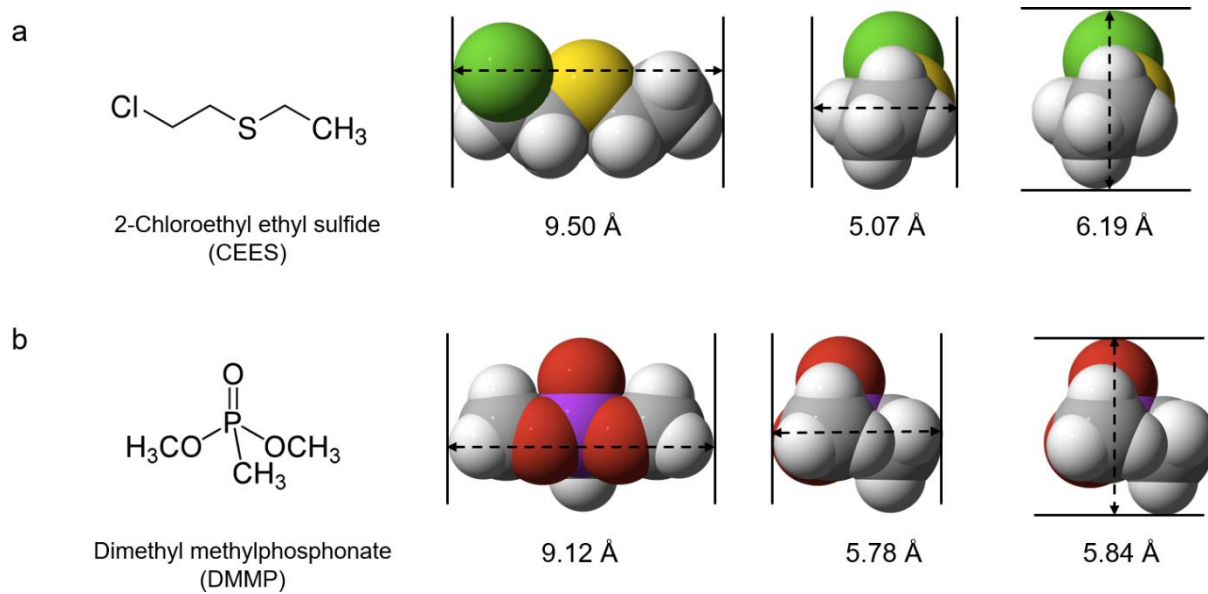

**Fig. S19** Structures and van der Waals models of (a) CEES and (b) DMMP; C: gray, S: yellow, Cl: green, H: white, O: red, P: purple.

**Table S1** BET surface areas and total pore volumes of ZIF-8 and T-ZIF-8 samples.

|           | Surface area<br>(m <sup>2</sup> g <sup>-1</sup> ) | Total pore volume<br>(cm <sup>3</sup> g <sup>-1</sup> ) |
|-----------|---------------------------------------------------|---------------------------------------------------------|
| ZIF-8     | 1320.1                                            | 0.67                                                    |
| 450-ZIF-8 | 1313.4                                            | 0.65                                                    |
| 500-ZIF-8 | 1245.2                                            | 0.65                                                    |
| 550-ZIF-8 | 1158.7                                            | 0.58                                                    |
| 570-ZIF-8 | 913.5                                             | 0.44                                                    |
| 600-ZIF-8 | 670.4                                             | 0.37                                                    |

**Table S2** Kinetic parameters of the pseudo-first order model for the adsorption of CEES and DMMP on ZIF-8 and T-ZIF-8 samples.

|           | CEES                  |                      |                | DMMP                  |                      |                |
|-----------|-----------------------|----------------------|----------------|-----------------------|----------------------|----------------|
|           | q <sub>e</sub> (mg/g) | k (h <sup>-1</sup> ) | R <sup>2</sup> | q <sub>e</sub> (mg/g) | k (h <sup>-1</sup> ) | R <sup>2</sup> |
| ZIF-8     | 446.4                 | 0.6651               | 0.9910         | 404.6                 | 0.0389               | 0.9993         |
| 450-ZIF-8 | 450.5                 | 0.8375               | 0.9818         | 426.6                 | 0.0456               | 0.9974         |
| 500-ZIF-8 | 500.0                 | 1.0672               | 0.9842         | 455.0                 | 0.0856               | 0.9796         |
| 550-ZIF-8 | 531.8                 | 1.4040               | 0.9820         | 497.1                 | 0.0986               | 0.9818         |
| 570-ZIF-8 | 486.7                 | 0.9235               | 0.9801         | 439.3                 | 0.0627               | 0.9877         |
| 600-ZIF-8 | 278.3                 | 1.0377               | 0.9680         | 340.2                 | 0.0401               | 0.9982         |
